# Supplementary material for: In Vitro Evaluation of Anti-Rift Valley Fever Virus, Antioxidant and Anti-Inflammatory Activity of South African Medicinal Plant Extracts
Source: Viruses. 2021 Jan 31;13(2):221. doi: 10.3390/v13020221 (PMC7912315; doi:10.3390/v13020221)
Supplement: Supplementary file 1 [file viruses-13-00221-s001.pdf]

---

## *Supplementary Information*

# **In Vitro Evaluation of Anti-RIFT Valley Fever Virus, Antioxidant and Anti-Inflammatory Activity of South African Medicinal Plant Extracts**

**Garland K. More <sup>1,\*</sup>, Raymond T. Makola <sup>2,3</sup> and Gerhard Prinsloo, <sup>1</sup>**

<sup>1</sup> College of Agriculture and Environmental Sciences, University of South Africa, Private Bag X6, Florida 1710, South Africa; moregk@unisa.ac.za (G.K.M.); prinsg@unisa.ac.za (G.P.)

<sup>2</sup> Department of Biochemistry Microbiology and Biotechnology, School of Molecular and Life Science, University of Limpopo (Turfloop Campus) Sovenga 0727; makolaraymond4@gmail.com (R.T.M.)

<sup>3</sup> National institution of communicable diseases, Special Viral Pathogen/ Arbovirus Unit, 1 Modderfontein Rd, Sandringham, Johannesburg 2192

\* Correspondence: moregk@unisa.ac.za

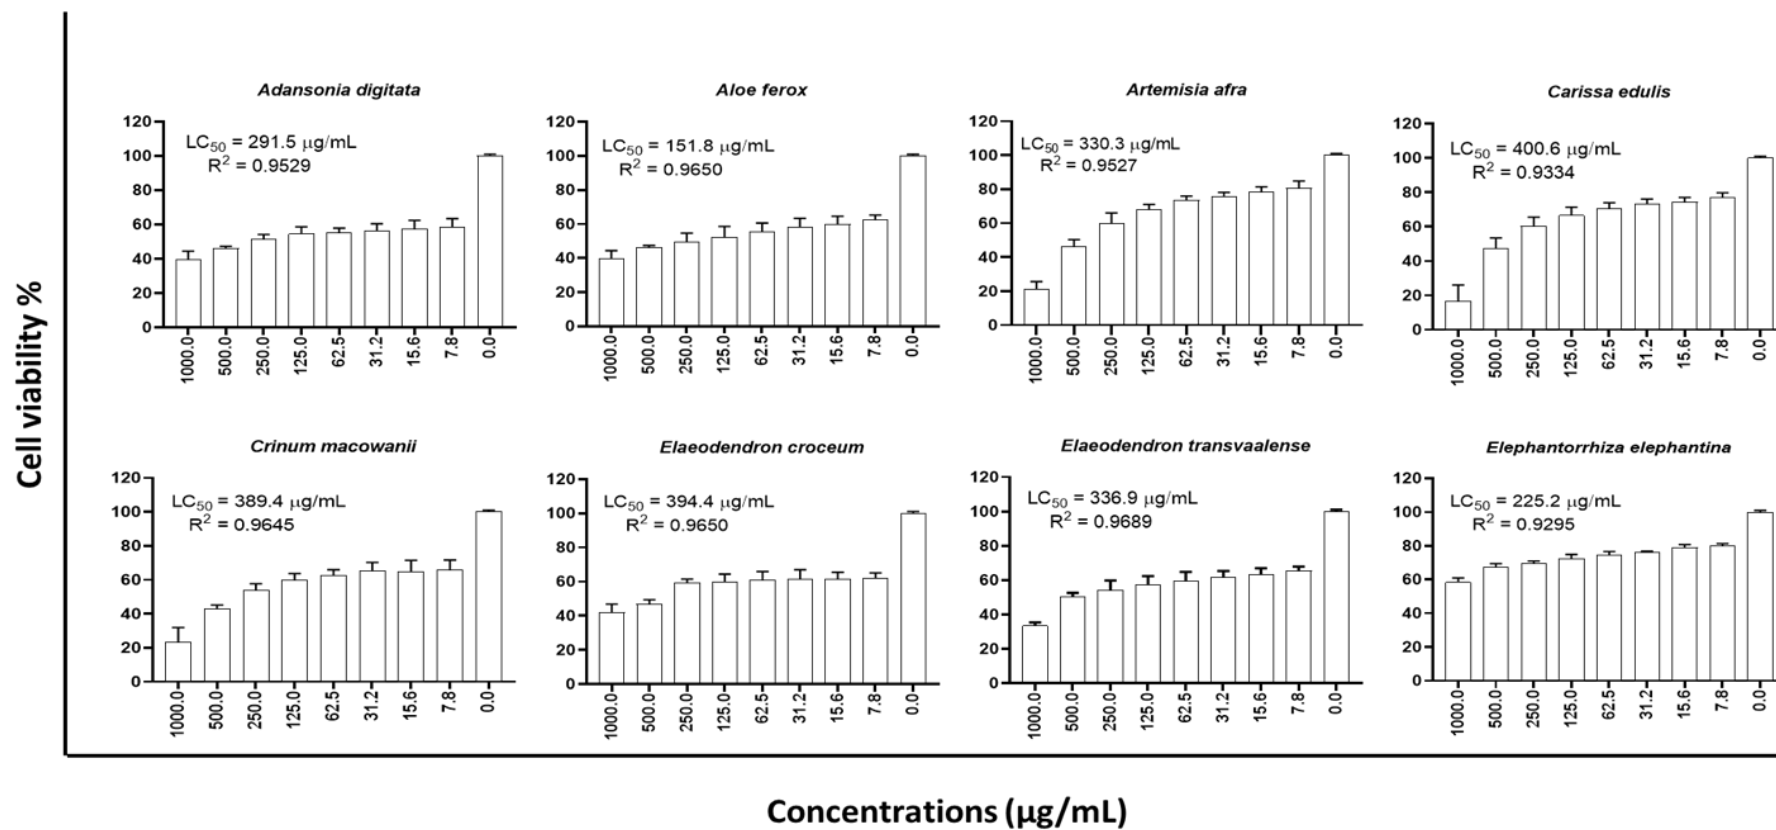

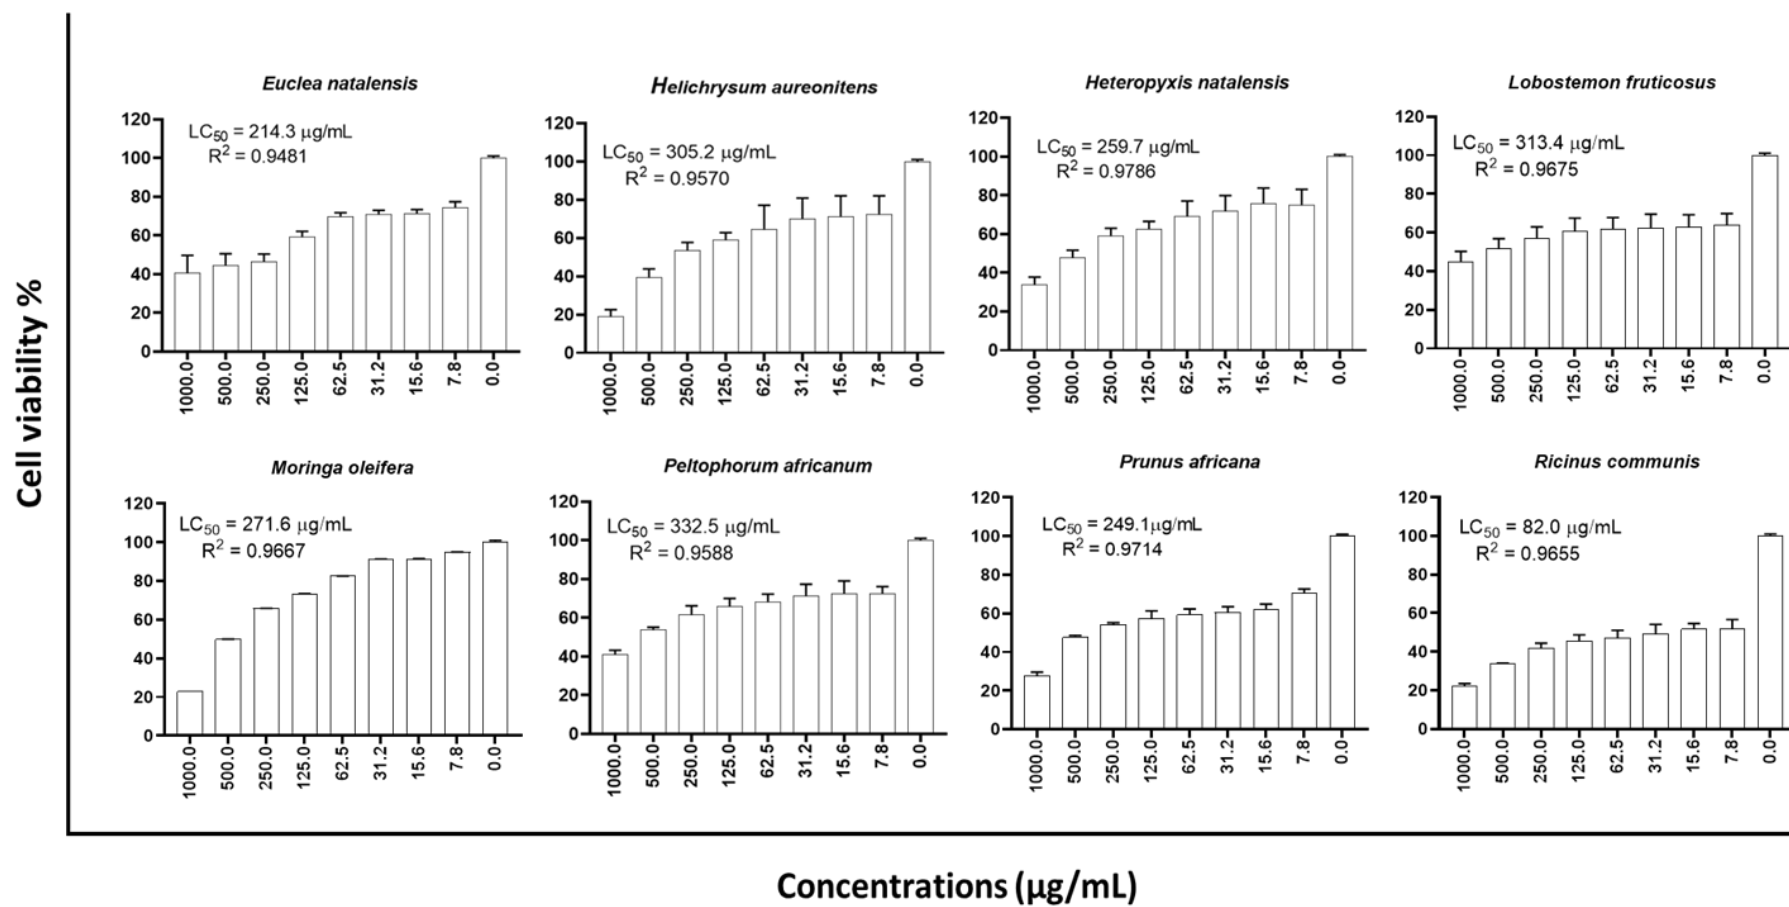

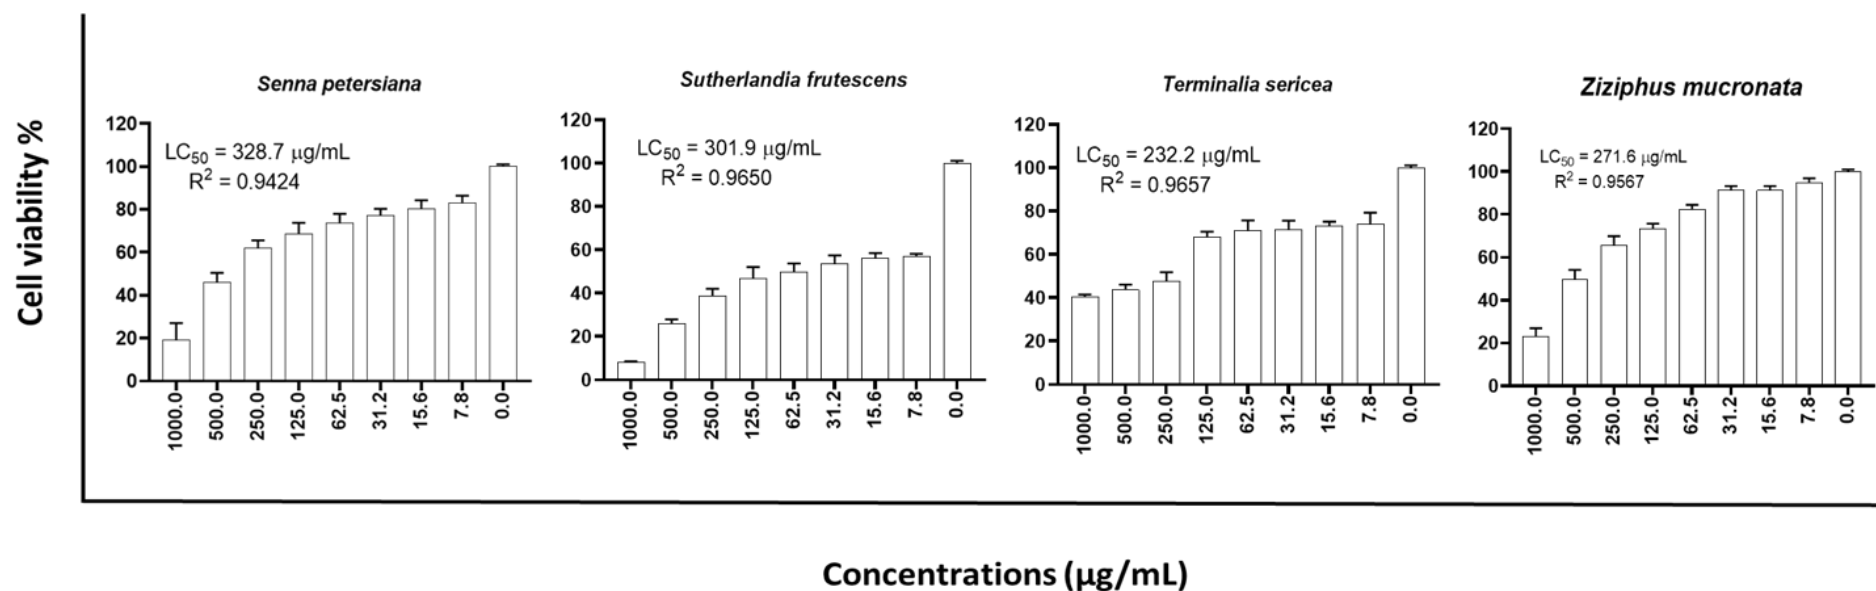

**Figure S1:** Lethal concentration (LC<sub>50</sub> = µg/mL) of the MTT assays following 48 hours treatment with twenty plant extracts well known for their antiviral activity.

A

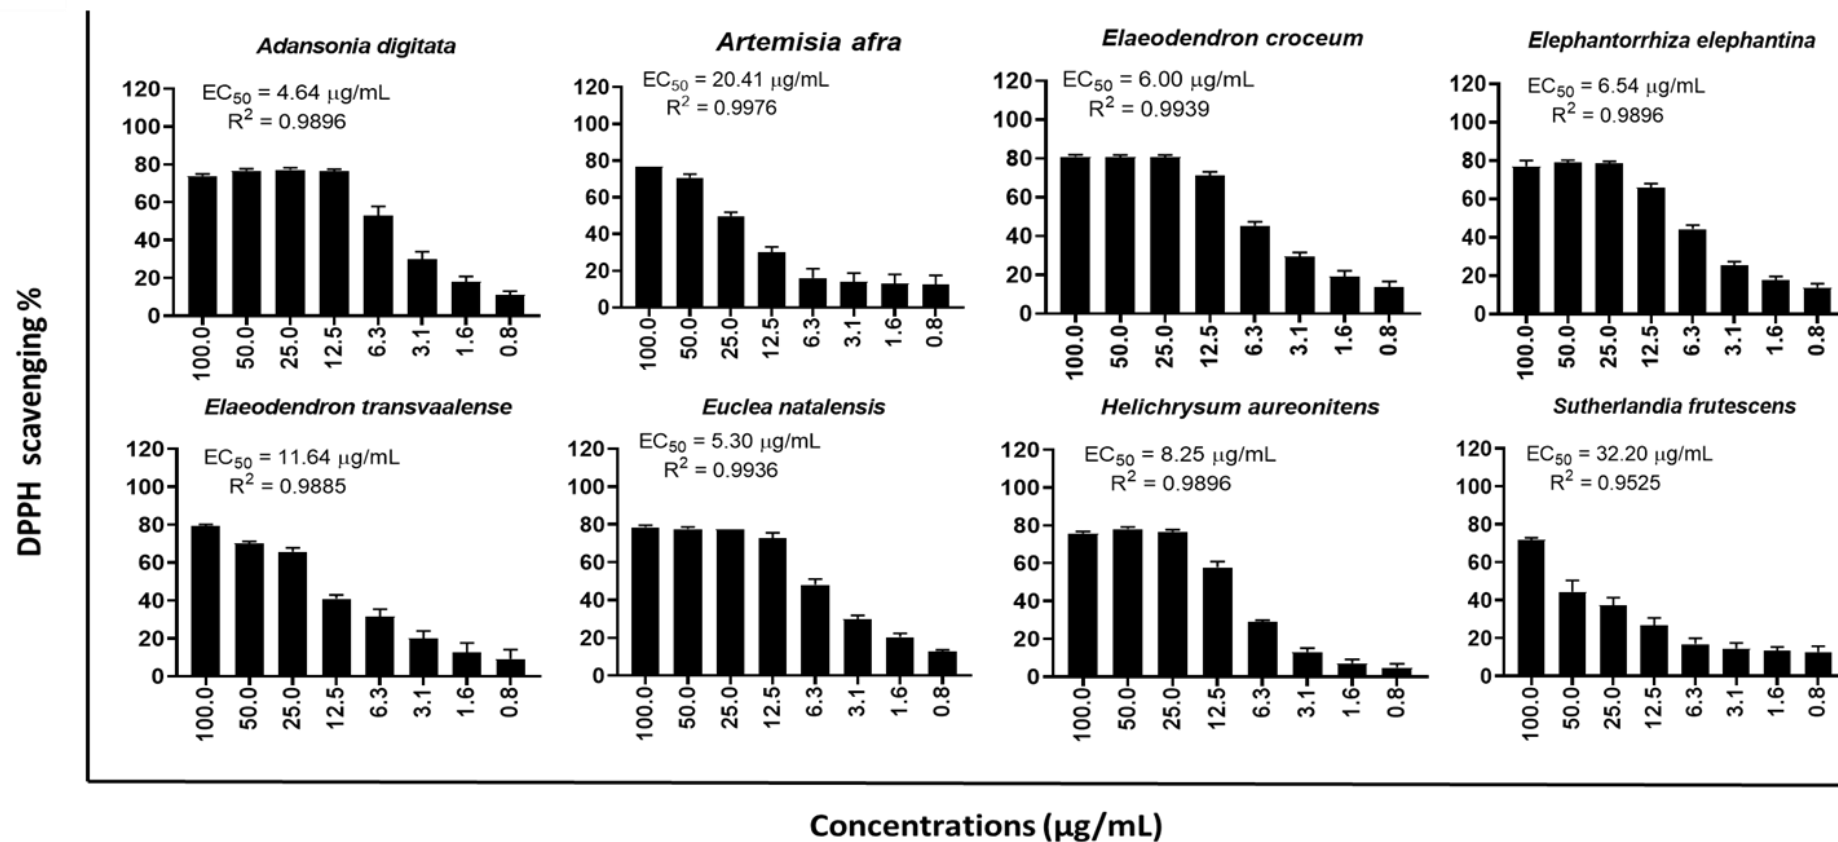

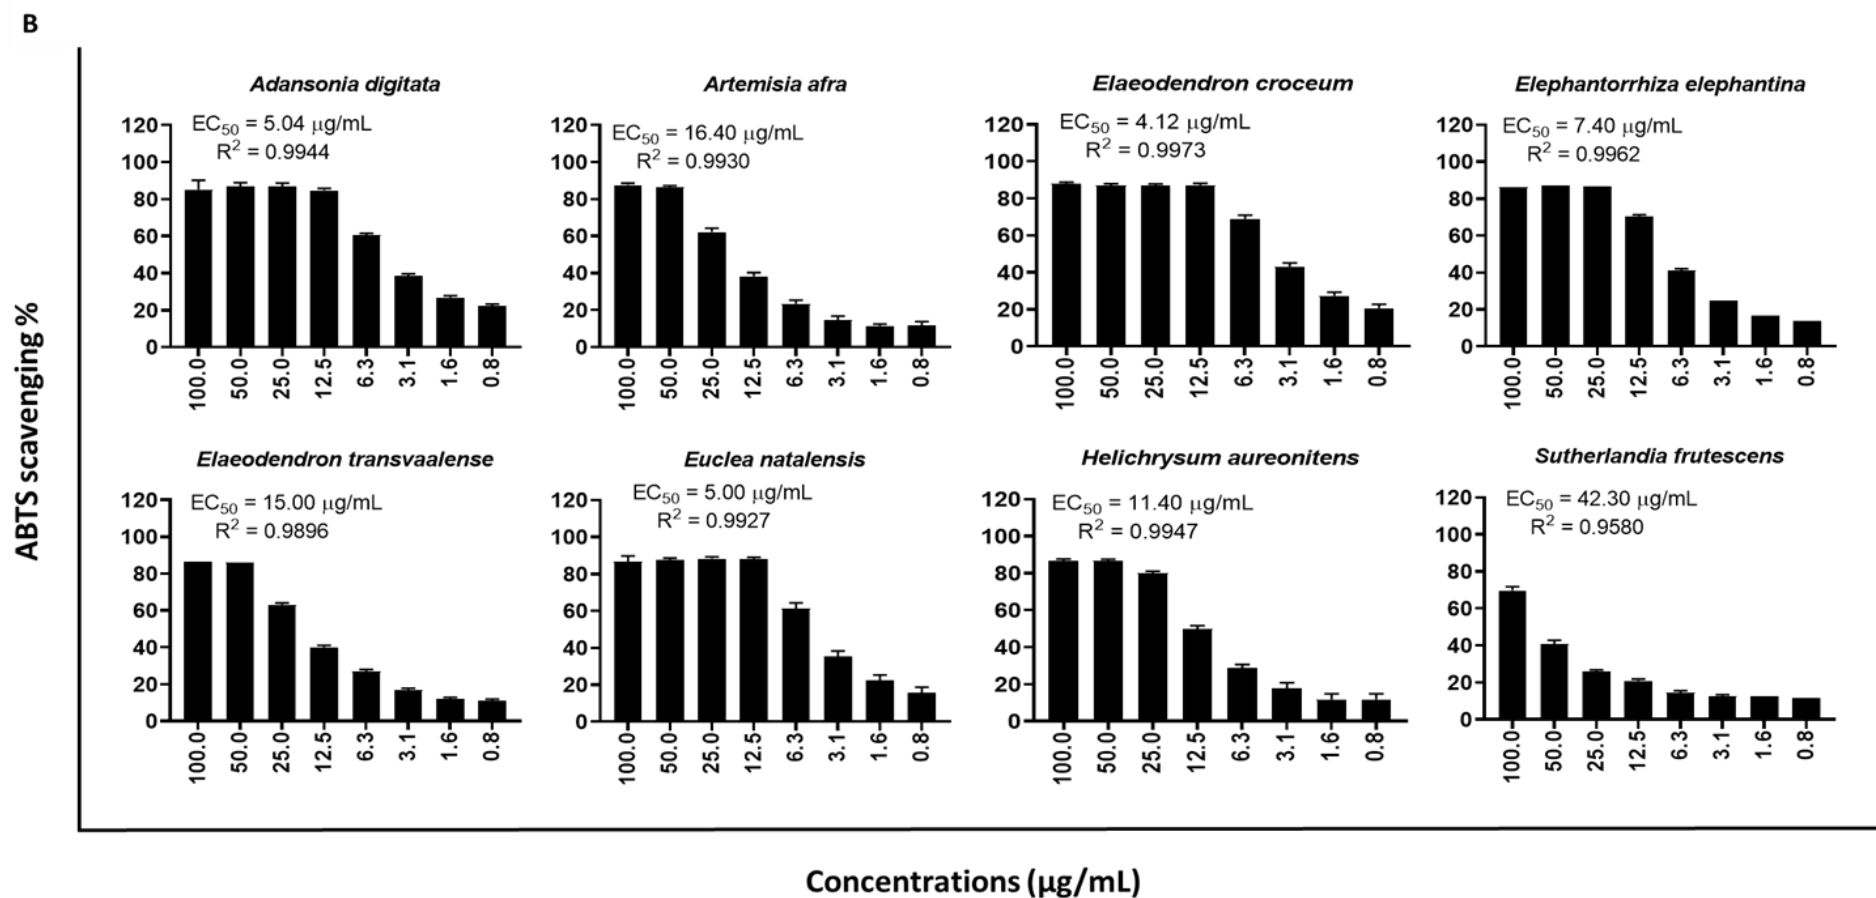

**Figure S2:** Effective concentration ( $\text{EC}_{50}$  =  $\mu\text{g/mL}$ ) of the DPPH (A) and ABTS (B) assays following 48 hours treatment with eight plant extracts well known for their antiviral activity.
